# Supplementary material for: Trends in Hospital Admissions and Death Causes in Patients with Systemic Lupus Erythematosus: Spanish National Registry
Source: MDPI journal article supplement (doi:10.3390/jcm10245749), 2021-12-08
Supplement: s1 [file s1]

**Table S1. Admission and death causes by categories.**

| Group                       |            | Global       | 1997-2000   | 2001-2005   | 2006-2010    | 2011-2015                 |
|-----------------------------|------------|--------------|-------------|-------------|--------------|---------------------------|
| Cardiovascular disease      |            |              |             |             |              |                           |
| Coronary disease            | Admissions | 1911 (1.91%) | 213 (1.35%) | 433 (1.79%) | 566 (2.03%)  | 699 (2.19%) <sup>T</sup>  |
|                             | Deaths     | 88 (3.16%)   | 13 (3.70%)  | 21 (3.19%)  | 25 (3.13%)   | 29 (2.97%)                |
| Cerebrovascular disease     | Admissions | 1791 (1.79%) | 217 (1.37%) | 371 (1.53%) | 520 (1.87%)  | 683 (2.14%) <sup>T</sup>  |
|                             | Deaths     | 175 (6.28%)  | 18 (5.13%)  | 41 (6.22%)  | 51 (6.39%)   | 65 (6.65%)                |
| Heart failure               | Admissions | 1671 (1.67%) | 187 (1.18%) | 312 (1.29%) | 473 (1.7%)   | 699 (2.19%) <sup>T</sup>  |
|                             | Deaths     | 150 (5.38%)  | 17 (4.84%)  | 27 (4.1%)   | 35 (4.39%)   | 71 (7.26%)                |
| Arterial TE                 | Admissions | 153 (0.15%)  | 24 (0.15%)  | 31 (0.13%)  | 39 (0.14%)   | 59 (0.18%)                |
|                             | Deaths     | 7 (0.25%)    | 0 (0%)      | 1 (0.15%)   | 4 (0.50%)    | 2 (0.2%)                  |
| Hypertensive kidney disease | Admissions | 412 (0.41%)  | 38 (0.24%)  | 59 (0.24%)  | 128 (0.46%)  | 187(0.58%) <sup>T</sup>   |
|                             | Deaths     | 11 (0.39%)   | 0 (0%)      | 1 (0.15%)   | 1 (0.13%)    | 9 (0.92%)                 |
| Arteriosclerosis            | Admissions | 404 (0.40%)  | 23 (0.15%)  | 82 (0.34%)  | 135 (0.48%)  | 164 (0.51%) <sup>T</sup>  |
|                             | Deaths     | 16 (0.57%)   | 0 (0%)      | 4 (0.61%)   | 7 (0.88%)    | 5 (0.51%)                 |
| Peripheral arterial disease | Admissions | 1135 (1.14%) | 76 (0.48%)  | 160 (0.66%) | 235 (0.84%)  | 245 (0.77%) <sup>T</sup>  |
|                             | Deaths     | 68 (2.44%)   | 7 (1.99%)   | 15 (2.28%)  | 23 (2.88%)   | 20 (2.04%)                |
| Infection                   |            |              |             |             |              |                           |
| Respiratory                 | Admissions | 4107 (4.11%) | 485 (3.07%) | 889 (3.67%) | 1235 (4.43%) | 1498 (4.68%) <sup>T</sup> |
|                             | Deaths     | 195 (7%)     | 23 (6.55%)  | 44 (6.68%)  | 58 (7.27%)   | 70 (7.16%)                |
| Urinary                     | Admissions | 1962 (1.96%) | 231 (1.46%) | 419 (1.73%) | 564 (2.02%)  | 748 (2.34%) <sup>T</sup>  |
|                             | Deaths     | 28 (1%)      | 2 (0.57%)   | 8 (1.21%)   | 14 (1.75%)   | 4 (0.41%)                 |
| Sepsis                      | Admissions | 702 (0.7%)   | 49 (0.31%)  | 94 (0.39%)  | 164 (0.59%)  | 395 (1.24%) <sup>T</sup>  |
|                             | Deaths     | 165 (5.92%)  | 8 (2.28%)   | 27 (4.1%)   | 41 (5.14%)   | 89 (9.1%) <sup>T</sup>    |

|                      |            |                 |             |             |                |                           |
|----------------------|------------|-----------------|-------------|-------------|----------------|---------------------------|
| Skin and soft tissue | Admissions | 1100<br>(1.10%) | 79 (0.50%)  | 149 (0.62%) | 174<br>(0.62%) | 217 (0.68%) <sup>T</sup>  |
|                      | Deaths     | 26 (0.93%)      | 2 (0.7%)    | 1 (0.15%)   | 2 (0.25%)      | 5 (0.51%)                 |
| Abdominal            | Admissions | 603 (0.6%)      | 101(0.64%)  | 207 (0.86%) | 298<br>(1.07%) | 494 (1.54%) <sup>T</sup>  |
|                      | Deaths     | 16 (0.57%)      | 4 (1.14%)   | 7 (1.06%)   | 5 (0.62%)      | 10 (1.02%)                |
| Tuberculosis         | Admissions | 213 (0.21%)     | 51 (1.46%)  | 50 (0.21%)  | 65 (0.23%)     | 47 (0.15%) <sup>T</sup>   |
|                      | Deaths     | 17 (0.61%)      | 2 (0.57%)   | 7 (1.06%)   | 4 (0.50%)      | 3 (0.31%)                 |
| Neoplasm             |            |                 |             |             |                |                           |
| Solid organ          | Admissions | 2457 (2.46%)    | 170 (1.08%) | 468 (1.93%) | 737<br>(2.64%) | 1082 (3.83%) <sup>T</sup> |
|                      | Deaths     | 258<br>( 9.26%) | 21 (5.98%)  | 53 (8.04%)  | 81<br>(10.15%) | 103 (10.53%) <sup>T</sup> |
| Hematological        | Admissions | 453 (0.48%)     | 75 (0.47%)  | 86 (0.36%)  | 137<br>(0.49%) | 185 (0.58%)               |
|                      | Deaths     | 58 (2.08%)      | 4 (1.14%)   | 10 (1.52%)  | 18 (2.56%)     | 26 (2.66%)                |
| Benign               | Admissions | 851 (0.85%)     | 92 (0.58%)  | 171 (0.71%) | 245<br>(0.88%) | 343 (1.07%) <sup>T</sup>  |
|                      | Deaths     | 0 (0%)          | 0 (0%)      | 0 (0%)      | 0 (0%)         | 0 (0%)                    |
| Unknown origin       | Admissions | 248 (0.25%)     | 37 (0.23%)  | 40 (0.16%)  | 69 (0.25%)     | 102 (0.32%)               |
|                      | Deaths     | 11 (0.39%)      | 1 (0.28%)   | 3 (0.46%)   | 1 (0.13%)      | 6 (0.61%)                 |
